# Supplementary material for: The Saccharomyces cerevisiae Cdk8 Mediator Represses AQY1 Transcription by Inhibiting Set1p-Dependent Histone Methylation
Source: PubMed Central journal article supplement (PMC5345701; doi:10.1534/g3.117.039586), 2017-01-30
Supplement: 1001FigureS1.pdf [file 1001FigureS1.pdf]

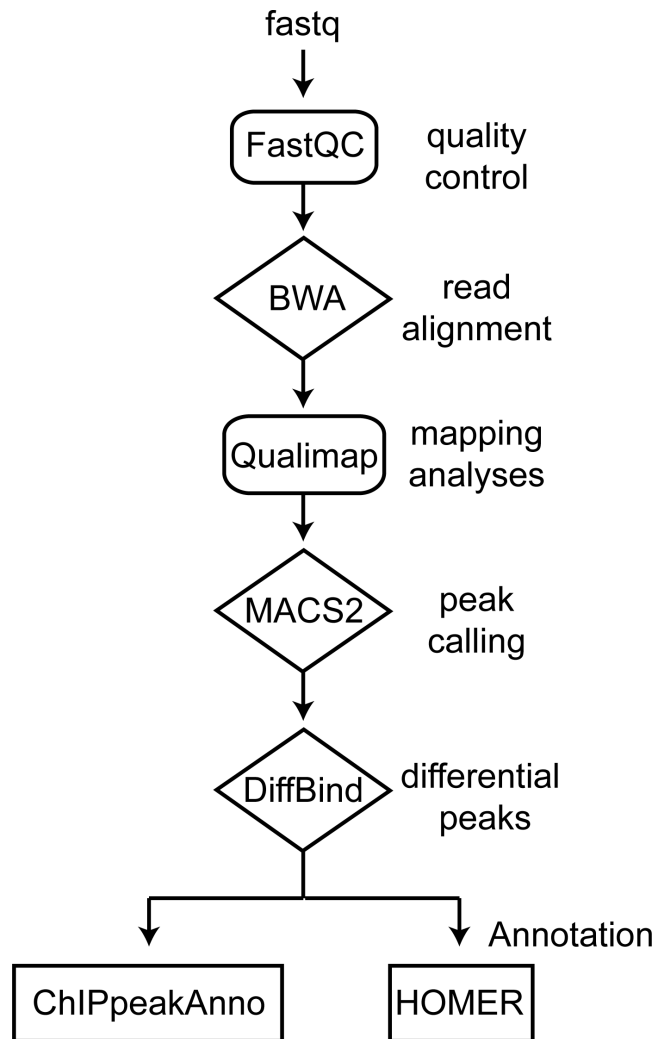

**Figure S1 ChIP-seq computational pipeline.** Following quality control, NGS sequence reads (.fastq files) were mapped to the SK1 genome using BWA. Differential peaks were called by invoking MACS2 and DiffBind, all peaks that were  $\geq 2$ -fold enriched in *cnc1Δjhd2Δ* mutants were annotated. Resulting .bed files were first annotated by ChIPPeakAnno to identify the relationship of peak to neighboring ORF and the distribution of peaks relative to TSS; GO annotations and TF binding predictions were made by HOMER. See Materials and Methods section for more detail.
