# Supplementary material for: The Saccharomyces cerevisiae Cdk8 Mediator Represses AQY1 Transcription by Inhibiting Set1p-Dependent Histone Methylation
Source: PubMed Central journal article supplement (PMC5345701; doi:10.1534/g3.117.039586), 2017-01-30
Supplement: 1001FigureS2.pdf [file 1001FigureS2.pdf]

wild type  
Coverage across reference

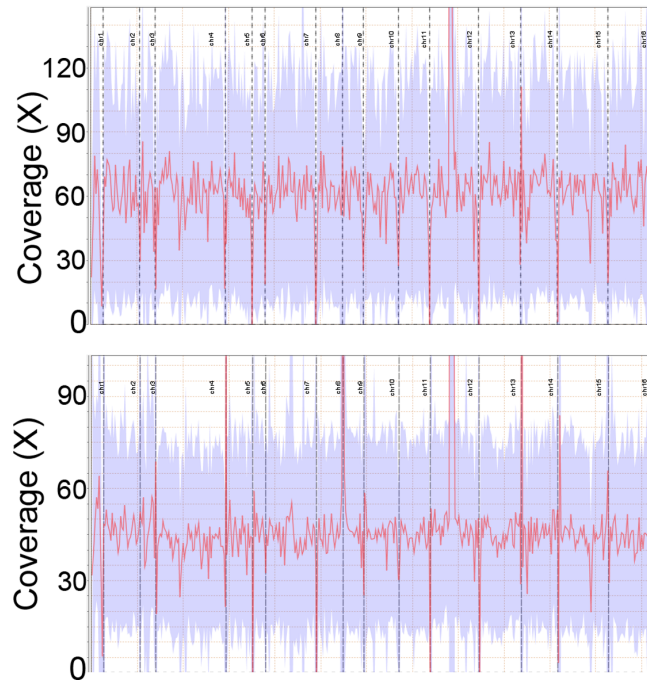

*cnc1Δjhd2Δ*  
Coverage across reference

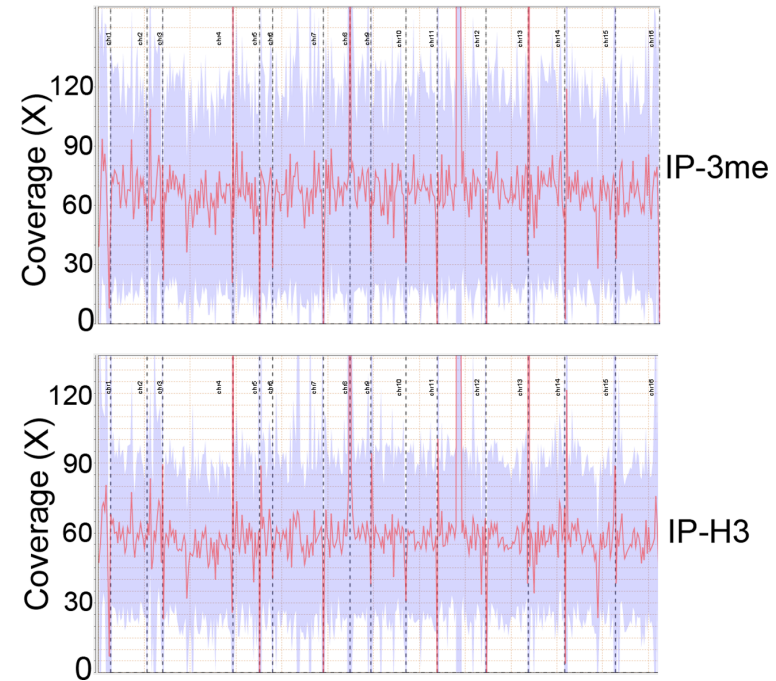

**Figure S2 Representative analyses of chromosomal coverage of mapped reads by Qualimap.** Fold coverage calculations performed by Qualimap for biological replicate 1, sequencing replicate 1 of ChIP-seq experiments. Red lines indicate the average fold coverage, shaded areas are the standard deviation fold coverage. Each chromosome is represented with vertical dashed lines separating them.
