# Supplementary material for: The Saccharomyces cerevisiae Cdk8 Mediator Represses AQY1 Transcription by Inhibiting Set1p-Dependent Histone Methylation
Source: PubMed Central journal article supplement (PMC5345701; doi:10.1534/g3.117.039586), 2017-01-30
Supplement: 1001FigureS4.pdf [file 1001FigureS4.pdf]

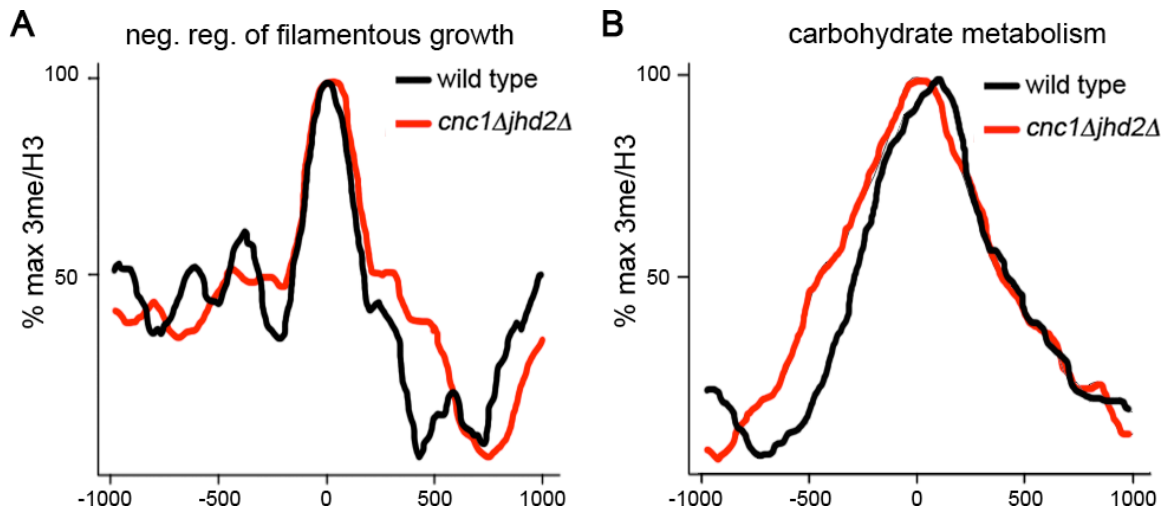

**Figure S4 TSS curves for negative regulators of filamentous growth and genes involved in carbohydrate metabolism.** H3Lys4 3me/histone H3 distribution was determined relative to the transcriptional start site of (A) negative regulators of filamentous growth or (B) carbohydrate metabolism genes.
