# Supplementary material for: The Saccharomyces cerevisiae Cdk8 Mediator Represses AQY1 Transcription by Inhibiting Set1p-Dependent Histone Methylation
Source: PubMed Central journal article supplement (PMC5345701; doi:10.1534/g3.117.039586), 2017-01-30
Supplement: 1001TableS1.pdf [file 1001TableS1.pdf]

**Table S1 qPCR primers used in this study**

| <b>Primer name</b>      | <b>Primer sequence (5' -&gt; 3')</b> |
|-------------------------|--------------------------------------|
| <i>AQY1_I</i> forward   | TGTTTGCTTATGCGCGATGC                 |
| <i>AQY1_I</i> reverse   | AATCGTGGTTTCGTTCATGCC                |
| <i>AQY1_II</i> forward  | CCGTCGTTTATCCCTCAAAGC                |
| <i>AQY1_II</i> reverse  | TGGAAGGACATCAGGCATAAGG               |
| <i>AQY1_III</i> forward | ACCGACAAGCAACATACACG                 |
| <i>AQY1_III</i> reverse | AGCGATGGTGCTTTGTTTCC                 |
| <i>AQY1_IV</i> forward  | TGGAGAAGCGTGAAACCAAC                 |
| <i>AQY1_IV</i> reverse  | AAGCGACGTGTGCGATAAAC                 |
| <i>ENO1</i> forward     | GCCGCTGCTGAAAAGAATGT                 |
| <i>ENO1</i> reverse     | TGGAGAGGTCTTGGACTTAGACAA             |
| <i>INO1</i> forward     | TTTTGTTCCCGGCTTGGT T                 |
| <i>INO1</i> reverse     | CGTCTCCCGCAATGAATGTAC                |
| <i>TDH1</i> forward     | CCACCGGTGTTTTCAAGGAA                 |
| <i>TDH1</i> reverse     | GGCACCAGCGTCAATGTG                   |
| <i>ACT1</i> forward     | TCGTTCCAATTTACGCTGGTT                |
| <i>ACT1</i> reverse     | CGGCCAATCGATTCTCAA                   |
